# Supplementary material for: Enhanced photoresponse of a high-performance self-powered UV photodetector based on ZnO nanorods and a novel electrolyte by the piezo-phototronic effect
Source: Royal Society of Chemistry journal article supplement (doi:10.1039/c8ra05909h), 2018-01-01
Supplement: c8ra05909h1.pdf [file c8ra05909h1.pdf]

# Enhanced photoresponse of high-performance self-powered UV photodetector based on ZnO nanorods and a novel electrolyte by piezo-phototronic effect

Xiaoli Peng<sup>a</sup>, Weihao Wang<sup>a</sup>, Yiyu Zeng<sup>a</sup>, Xinhua Pan<sup>\*a</sup>, Zhizhen Ye<sup>\*a</sup> and Yujia Zeng<sup>b</sup>

<sup>a</sup>State Key Laboratory of Silicon Materials, Cyrus Tang Center for Sensor Materials and Applications, School of Materials Science and Engineering, Zhejiang University, Hangzhou 310027, People's Republic of China

<sup>b</sup>Shenzhen Key Laboratory of Laser Engineering, College of Optoelectronic Engineering, Shenzhen University, Shenzhen 518060, People's Republic of China.

## CONTENTS

Fig. S1. The schematic diagram of the device structure.

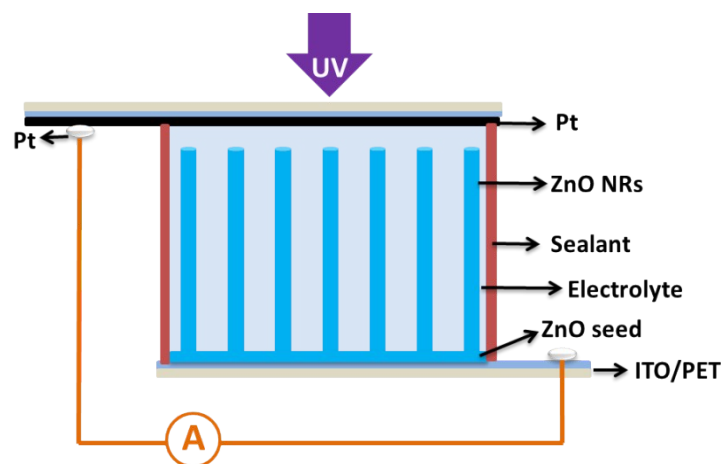

Fig. S1. The schematic diagram of the device structure.

Fig. S2. XRD pattern of ZnO NRs.

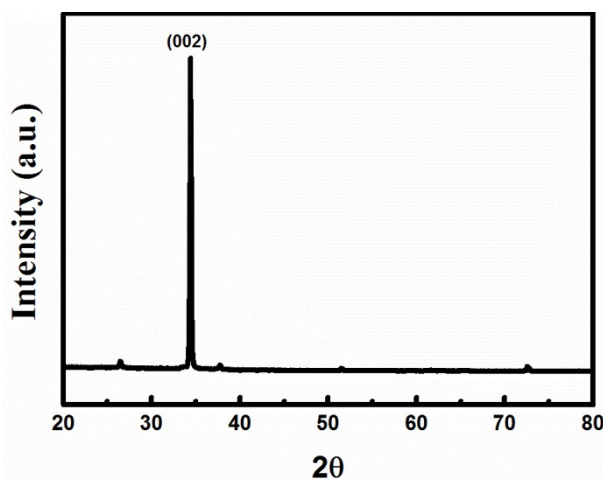

Fig. S2. XRD pattern of ZnO NRs.

Fig. S3. Photocurrent response characteristic under different way of turning on the light.

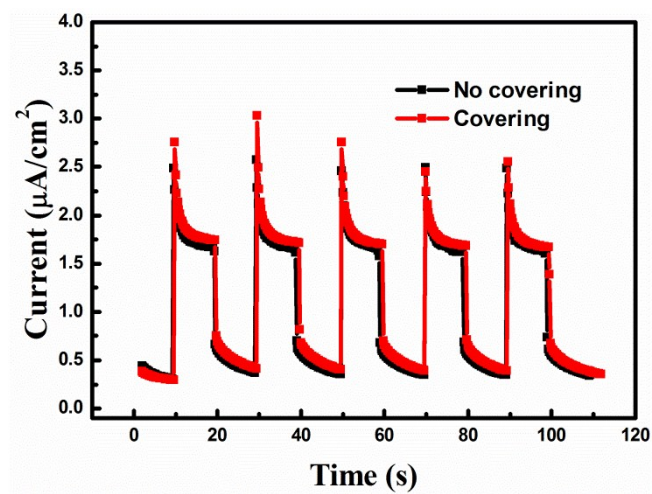

Fig. S3. Photocurrent response characteristic under different way of turning on the light.
